# Supplementary material for: Calibration of a large-scale hydrological model using satellite-based soil moisture and evapotranspiration products
Source: Copernicus journal article supplement (doi:10.5194/hess-21-3125-2017), 2017-06-29
Supplement: Supplementary file 1 [file hess-21-3125-2017-supplement.pdf]

Supplement of Hydrol. Earth Syst. Sci., 21, 3125–3144, 2017  
<https://doi.org/10.5194/hess-21-3125-2017-supplement>  
© Author(s) 2017. This work is distributed under  
the Creative Commons Attribution 3.0 License.

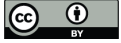

*Supplement of*

## **Calibration of a large-scale hydrological model using satellite-based soil moisture and evapotranspiration products**

**Patricia López López et al.**

*Correspondence to:* Patricia López López ([patricia.lopez@deltares.nl](mailto:patricia.lopez@deltares.nl))

The copyright of individual parts of the supplement might differ from the CC BY 3.0 License.

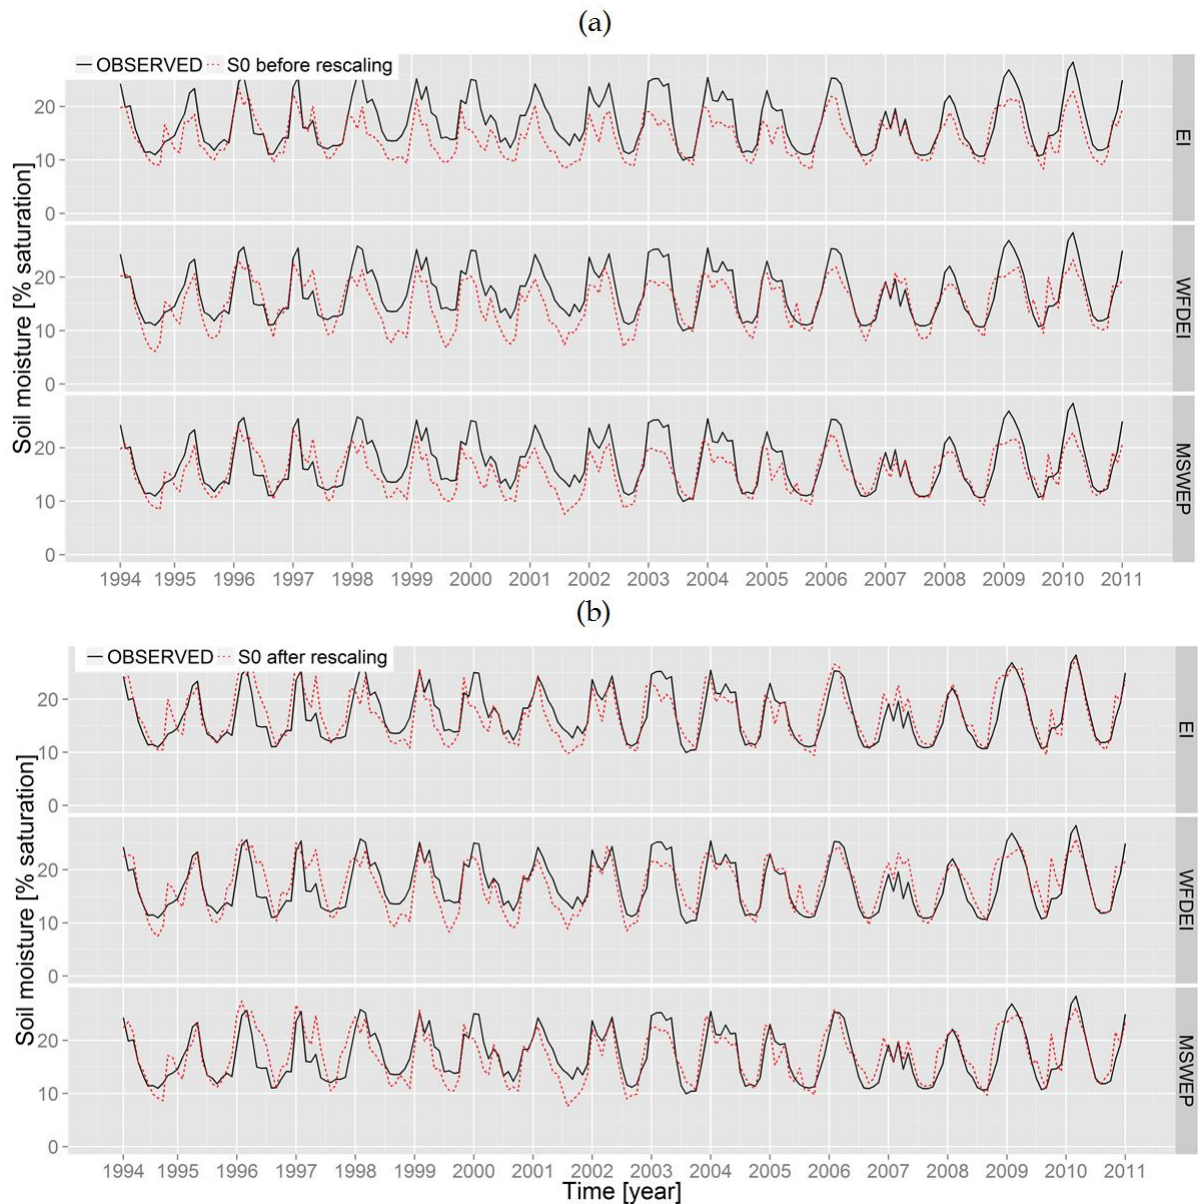

**Figure S1.** Comparisons between monthly ESA CCI soil moisture (black) and estimated soil moisture (red) time series over the Oum Er Rbia basin for the validation time period. Rows show the three global precipitation products. The red dashed lines represent soil moisture estimates from calibration scenario S0 (reference scenario) a) before the mean-standard deviation matching is applied and b) after the mean-standard deviation matching is applied.

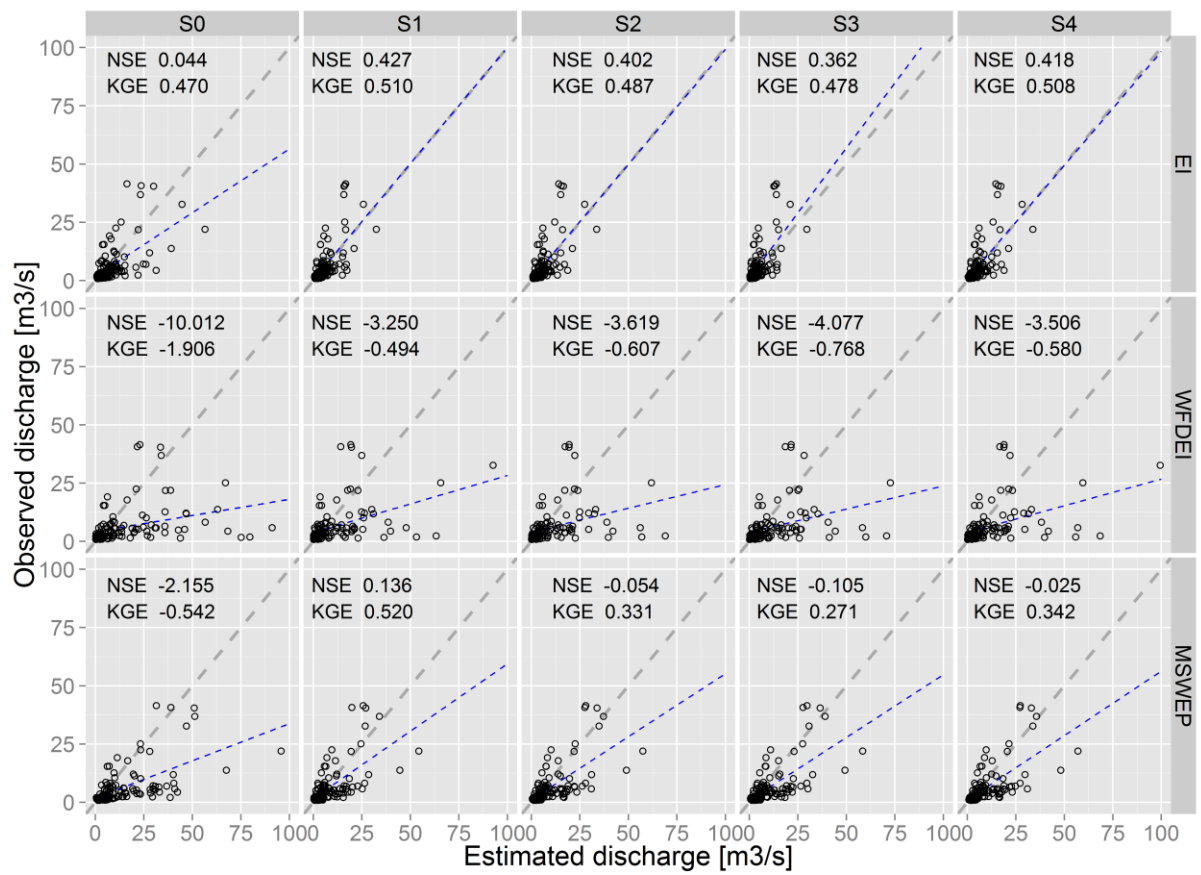

**Figure S2.** Scatterplots of monthly estimated discharge (x-axis) and observed discharge (y-axis) at Ait Ouchene. Rows show the three global precipitation products and %columns show the five calibration scenarios.
